# Supplementary material
Source: PubMed Central journal article supplement (PMC7755102)
Supplement: NIHMS1065536-supplement-1.pdf [file NIHMS1065536-supplement-1.pdf]

## Supplementary materials

### Variability in flight initiation distance

It is important to note that participants had a larger time window in which to respond in the slow predator condition, thus, while the variances of the empirical attack times were not significantly different (all subjects experienced the same empirical attack times; fast vs medium:  $F(24, 23) = 1.36, p = 0.464$ , medium vs slow:  $F(23, 22) = 0.57, p = 0.186$ , fast vs slow:  $F(24, 22) = 0.78, p = 0.537$ ), the variance in escape distances was not equal across predator types, neither across subjects (variances across median FIDs, fast vs medium:  $F(26, 27) = 0.25, p < 0.001$ , medium vs slow:  $F(27, 27) = 0.27, p = 0.001$ , fast vs slow:  $F(26, 27) = 0.07, p < 0.001$ ), nor within subjects (t-test of per subject FID variance, fast vs medium:  $t(32.94) = -6.12, p < 0.001$ , medium vs slow:  $t(32.22) = -5.67, p < 0.001$ , fast vs slow:  $t(27.59) = -7.91, p < 0.001$ ). In particular, the slow predator condition had significantly larger variance in responses (mean per subject variances were 90.44, 32.51, and 12.82, for slow, medium, and fast predators, respectively).

Importantly, these differences in response variability were a direct consequence of the experimental manipulation, that is, the manipulation designed to elicit “reactive” fear allowed a relatively shorter response window, and thus entailed increased urgency. For this reason, we do not consider the differences in response variability to be a confounding factor, but rather a necessary feature of the manipulation. However, to provide some evidence that the wider time window alone was not responsible for the relationship between FID and STAI-Y scores, we pooled the responses across the fast and medium predator types. The variance of median responses in this pooled data was not significantly different from that of the slow predator condition ( $F(54, 27) = 0.73, p = 0.329$ ). We performed a similar linear regression analysis with this pooled data, which showed that the interaction effect between the slow predator condition and STAI-Y scores remained significant ( $\beta = 0.56, SE = 0.06, p < 0.001$ ). Overall, this suggested that this relationship between STAI-Y scores and FID was not simply due to subjects having a larger variance of responses in the slow predator condition.

### Behavioral inhibition and flight initiation distance

Another trait factor that may have played a role in escape decisions is sensitivity to punishment, or behavioral inhibition<sup>26</sup>. Originally, this was proposed as a neurobiological substrate for anxiety<sup>50</sup>, and is still routinely believed to play an important role in anticipating and assessing threats. We wished to investigate whether behavioral inhibition could also explain some of the variance in flight distance, above or beyond that of trait anxiety as measured by the STAI-Y. Firstly, we tested whether STAI-Y scores and BIS scores were related within our sample. A Pearson correlation showed the relationship between STAI-Y scores and BIS scores was not significant across participants ( $r(26) = .09, p = .660$ ). We then ran a mixed effects regression analysis similar to that used in the main text, with FID as the dependent variable, and predator type, STAI-Y scores, and BIS score as independent variables (Table 3). The results of this analysis recapitulated the effects observed in previous model, including the significant interaction between STAI-Y scores and the slow predator condition ( $\beta = -7.4, SE = 0.2, p < 0.001$ ). The model additionally revealed a significant interaction effect of BIS score and predator type for the slow predator condition ( $\beta = -2.98, SE = 0.47, p < 0.001$ ). It also revealed a significant three-way interaction between BIS score and STAI-Y scores in both the medium ( $\beta = 0.02, SE = 0.01, p = 0.031$ ) and slow predator conditions ( $\beta = 0.08, SE = 0.01, p < 0.001$ ). As can be seen in the median split visualization plotted in Figure 3, the relationship between STAI-Y scores and FID appears to be driven predominantly by those with higher BIS scores. However, it is critical to note that this result should be interpreted with caution, as three-way interaction effects require substantially more experimental power to appropriately detect, and the sample size of this study was not chosen with this in mind. In general, this analysis suggests that the STAI-Y and BIS scores are separable, and that BIS similarly, but independently, influences FID.

We have also performed an exploratory fMRI analysis similar to the analysis of trait anxiety within the slow predator condition (see main text), but instead using BIS score. Here we find significant activity in the thalamus and right caudate (Table 4).

### Performance data

Here we report the summary statistics for participants performance in the task, as a function of predator condition (Table 5).

### Activation table for 2<sup>nd</sup> level STAI-Y score correlation for PPI (vHPC seed)

#### PPI with hippocampus seed

In the main text we reported the results of a PPI analysis showing modulation of brain areas by STAI-Y score from a dorsal hippocampus seed. Given that literature has also pointed to interactions between dorsal hippocampus and mPFC<sup>27</sup>, here we report the activation table for a similar analysis, using the entire hippocampus (Table 7).

### Slow predator versus control contrast modulated by anxiety

Here we report an analysis for the effect of STAI-Y scores within the slow predator condition similar to that presented in the main text, but using a contrast based on the control condition (Table 8. Note that an identical analysis using the fast predator

**Table 3.** Linear regression of predator type, STAI-Y and BIS on flight initiation distance

|                            | <i>Dependent variable:</i>     |
|----------------------------|--------------------------------|
|                            | Flight initiation distance     |
| Medium predator            | -7.048<br>(-23.123, 9.027)     |
| Slow predator              | -0.273<br>(-16.512, 15.966)    |
| STAI-Y                     | 0.014<br>(-0.786, 0.813)       |
| BIS                        | -0.032<br>(-1.941, 1.876)      |
| Medium predator:STAI-Y     | -0.346*<br>(-0.728, 0.035)     |
| Slow predator:STAI-Y       | -0.741***<br>(-1.126, -0.357)  |
| Medium predator:BIS        | -0.562<br>(-1.467, 0.344)      |
| Slow predator:BIS          | -2.978***<br>(-3.892, -2.064)  |
| STAI-Y:BIS                 | -0.001<br>(-0.046, 0.043)      |
| Medium predator:STAI-Y:BIS | 0.024**<br>(0.002, 0.045)      |
| Slow predator:STAI-Y:BIS   | 0.075***<br>(0.054, 0.097)     |
| Constant                   | 72.634***<br>(38.897, 106.371) |
| Observations               | 1,691                          |
| Log Likelihood             | -5,871.537                     |
| Akaike Inf. Crit.          | 11,771.080                     |
| Bayesian Inf. Crit.        | 11,847.140                     |
| <i>Note:</i>               | *p<0.1; **p<0.05; ***p<0.01    |

**Table 4.** Activation table for 2<sup>nd</sup> level BIS score correlation for the slow versus fast predator contrast

| Brain Region    | Left/Right | Cluster Size | t-score | MNI coordinates |     |   |
|-----------------|------------|--------------|---------|-----------------|-----|---|
|                 |            |              |         | x               | y   | z |
| <b>Thalamus</b> | R          | 41           | 4.50    | 12              | -12 | 0 |
| <b>Caudate</b>  | R          | 31           | 4.94    | 3               | 20  | 0 |

*Note:* p<0.05, FDR corrected

**Table 5.** Summary of performance measures

| Predator Type | N  | Mean earnings (SD) | Mean escape proportion (SD) |
|---------------|----|--------------------|-----------------------------|
| Slow          | 28 | 889.89 (174.6)     | 0.9 (0.09)                  |
| Medium        | 28 | 563.52 (75.54)     | 0.88 (0.11)                 |
| Fast          | 28 | 267.56 (83.97)     | 0.74 (0.2)                  |

**Table 6.** Activation table for 2<sup>nd</sup> level STAI-Y score correlation for PPI (vHPC seed)

| Brain Region                    | Left/Right | Cluster Size | T-score | MNI coordinates |    |    |
|---------------------------------|------------|--------------|---------|-----------------|----|----|
|                                 |            |              |         | x               | y  | z  |
| <b>Insula</b>                   | L          | 49           | 5.13    | -33             | 9  | 0  |
| <b>Medial Prefrontal Cortex</b> | R          | 168          | 5.00    | 15              | 60 | -6 |
| <b>Medial Prefrontal Cortex</b> | L          | 124          | 5.18    | -18             | 51 | -6 |
| <b>Inferior Frontal Gyrus</b>   | R          | 38           | 5.11    | 42              | 15 | 9  |

*Note:* p<0.05, FDR corrected

**Table 7.** Activation table for 2<sup>nd</sup> level STAI-Y score correlation for PPI (entire hippocampus)

| Brain Region                    | Left/Right | Cluster Size | t-score | MNI coordinates |     |     |
|---------------------------------|------------|--------------|---------|-----------------|-----|-----|
|                                 |            |              |         | x               | y   | z   |
| <b>Insula</b>                   | L          | 77           | 5.37    | -31             | 13  | 5   |
| <b>Medial Prefrontal Cortex</b> | R          | 96           | 4.62    | 11              | 52  | -14 |
| <b>Medial Prefrontal Cortex</b> | L          | 83           | 4.77    | -8              | 59  | -12 |
| <b>Inferior Frontal Gyrus</b>   | R          | 63           | 4.91    | 48              | 15  | -9  |
| <b>Parahippocampal Gyrus</b>    | R          | 57           | 5.56    | 26              | -20 | 15  |
| <b>Amygdala</b>                 | L          | 38           | 4.79    | -24             | -2  | -15 |

*Note:* p<0.05, FDR corrected

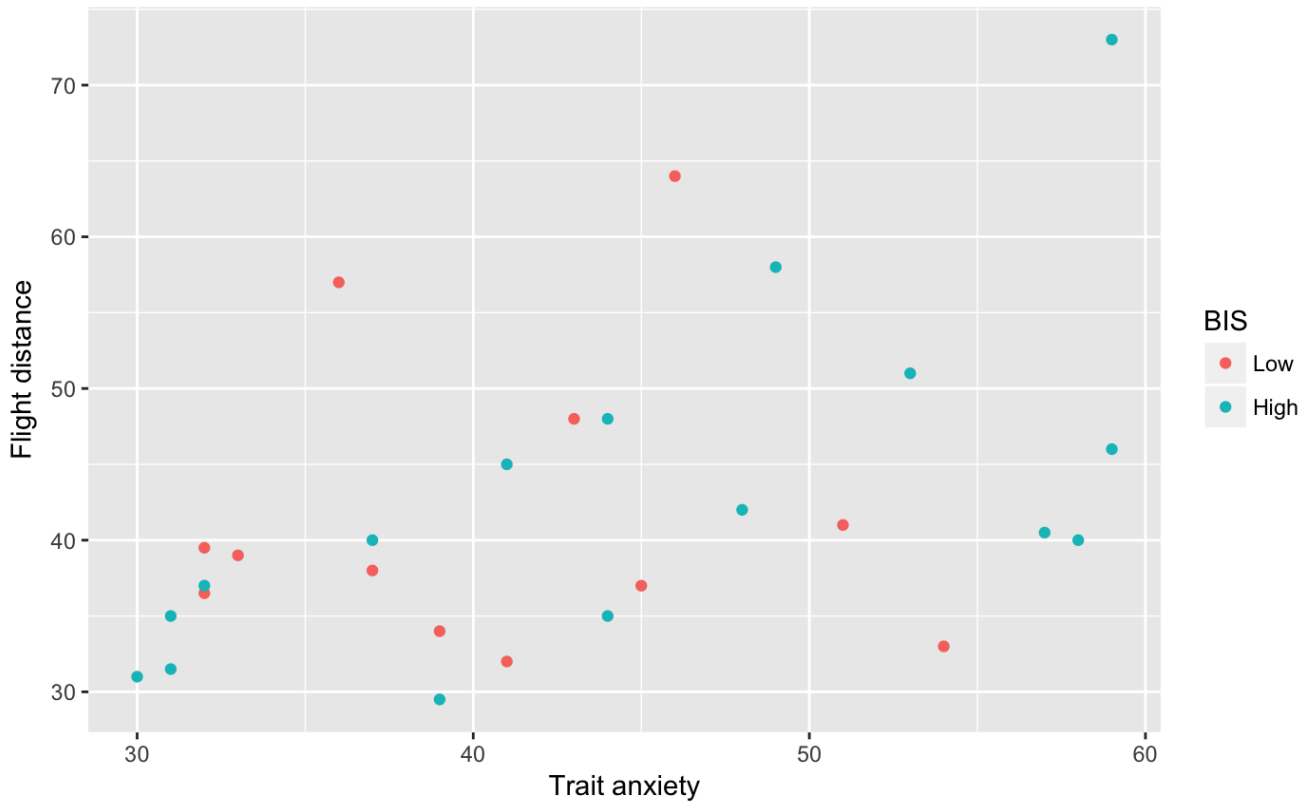

**Figure 3.** Visualization of the interaction of STAI-Y and BIS on flight initiation distance within the slow predator condition

445 condition versus the control condition does not reveal any significant activation in any areas.

**Table 8.** Activation table for 2<sup>nd</sup> level STAI-Y score correlation for the slow versus control predator contrast.

| Brain Region                    | Left/Right | Cluster Size | t-score | MNI coordinates |     |    |
|---------------------------------|------------|--------------|---------|-----------------|-----|----|
|                                 |            |              |         | x               | y   | z  |
| <b>Amygdala</b>                 | L          | 42           | 7.70    | -9              | -24 | -9 |
| <b>Hippocampus</b>              | L          | 25           | 6.26    | -27             | -39 | -6 |
| <b>Medial Prefrontal Cortex</b> | R          | 80           | 7.46    | 18              | 60  | -6 |
| <b>Postcentral Gyrus</b>        | L          | 144          | 4.38    | -57             | -21 | 48 |
| <b>Insula</b>                   | R          | 133          | 5.48    | 45              | -24 | 24 |

*Note:*

p<0.05, FDR corrected

446 **Visualization of BOLD signal change as a function of trait anxiety in four brain regions**

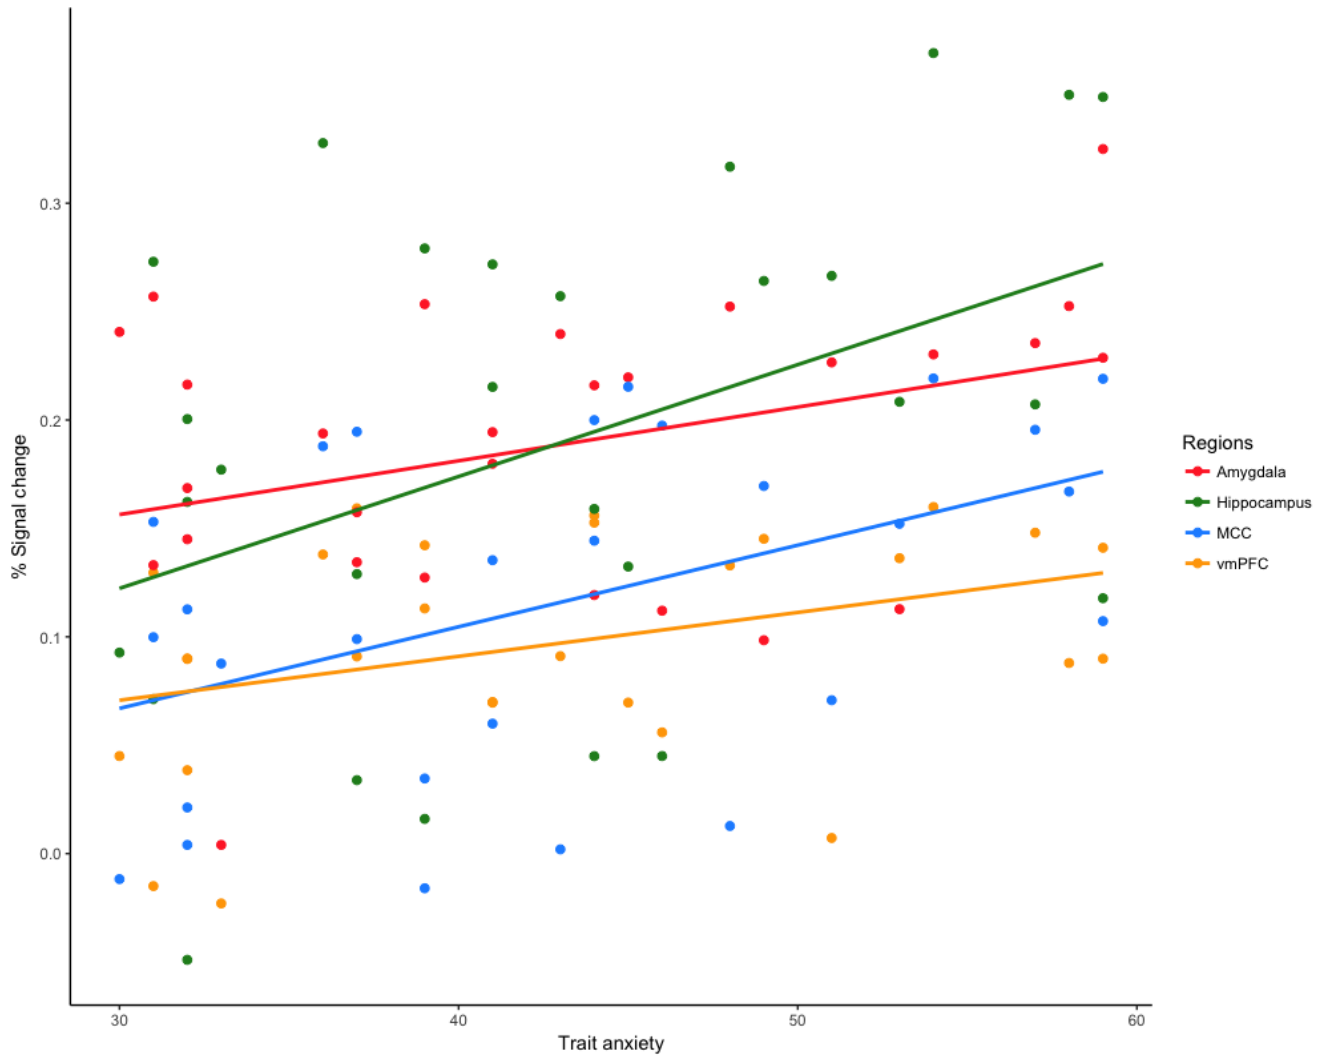

**Figure 4.** Visualization of BOLD signal change as a function of trait anxiety in four brain regions. vmPFC, ventromedial prefrontal cortex; MCC, mid-cingulate cortex.
